# Supplementary material for: Transitional genomes and nutritional role reversals identified for dual symbionts of adelgids (Aphidoidea: Adelgidae)
Source: PubMed Central journal article supplement (PMC8857208; doi:10.1038/s41396-021-01102-w), 2021-09-10
Supplement: 41396_2021_1102_MOESM1_ESM.pdf [file 41396_2021_1102_MOESM1_ESM.pdf]

Supplementary Table 1. Collection and identification information for adelgid samples sequenced in this study.

| <b>Adelgid species</b>    | <b>Voucher ID</b> | <b>Conifer lineage</b>             | <b>Collection information</b>                                                                                                         |
|---------------------------|-------------------|------------------------------------|---------------------------------------------------------------------------------------------------------------------------------------|
| <i>Adelges lariciatus</i> | Ad13-081          | Larch ( <i>Larix</i> )             | CANADA: British Columbia: Vernon: Kalamalka Seed Orchard. 21 xi 2013. Ex: <i>Picea sitchensis</i> , from gall. J. Corrigan, collector |
| <i>A. kitamiensis</i>     | NH18-608-01       | Larch ( <i>Larix</i> )             | JAPAN: Yamanashi: Kiyosato Hokuto-shi; 10 xiii 2018. Ex: <i>Picea maximowiczii</i> , from gall. S. Shiyake, collector                 |
| <i>A. cooleyi</i>         | 19-005CV          | Douglas-fir ( <i>Pseudotsuga</i> ) | USA: ID: Franklin County, Mile 11.5 on ID-36; 23 vii 2019. Ex: <i>Picea coloradensis</i> , from gall. C. von Dohlen, collector        |
| <i>A. piceae</i>          | Ad18-003.6        | True fir ( <i>Abies</i> )          | USA: UT, Mantua; 12 vi 2018. Ex: <i>Abies fraseri</i> , from bark. C. von Dohlen, collector                                           |
| <i>Pineus similis</i>     | Ad13-065          | Pine ( <i>Pinus</i> )              | CANADA: British Columbia: Vernon: Kalamalka Seed Orchard. 21 xi 2013. Ex: <i>Picea sitchensis</i> , from gall. J. Corrigan, collector |

Supplementary Table 2. Genetic characteristics and genic contents of plasmids recovered from *A. piceae* and *P. similis* assemblies.

| Host adelgid      | Plasmid node | Plasmid name | Size   | %GC  | Assembled into circular sequence | Gene                                                                 | Intact/Pseudogene | Top blast hit                                               | Perc. Ident | evalue    | ref                |
|-------------------|--------------|--------------|--------|------|----------------------------------|----------------------------------------------------------------------|-------------------|-------------------------------------------------------------|-------------|-----------|--------------------|
| <i>A. piceae</i>  | NODE_3533    | pAp1         | 19,437 | 33.5 | Y                                | thiazole synthase thiG                                               | Pseudogene        | <i>Candidatus</i> Hamiltonella defensa                      | 72.5        | 9.67E-28  | ref WP_158368048.1 |
|                   |              |              |        |      |                                  | 2-iminoacetate synthase thiH                                         | Pseudogene        | <i>Candidatus</i> Hamiltonella defensa                      | 55.495      | 7.33E-54  | ref WP_187306980.1 |
|                   |              |              |        |      |                                  | ABC transporter permease                                             | Pseudogene        | <i>Serratia rubidaea</i>                                    | 72.619      | 6.84E-37  | ref WP_126533423.1 |
|                   |              |              |        |      |                                  | autotransporter domain-containing protein                            | Intact            | <i>Serratia symbiotica</i>                                  | 62.331      | 9.75E-157 | gb NIH12260.1      |
|                   |              |              |        |      |                                  | helix-turn-helix domain-containing protein                           | Intact            | <i>Salmonella enterica</i>                                  | 68.027      | 2.15E-69  | gb EAQ6300284.1    |
|                   |              |              |        |      |                                  | Autotransporter beta-domain superfamily protein                      | Intact            | <i>Candidatus</i> Erwinia haradaeae                         | 39.623      | 1.07E-150 | emb VFP86476.1     |
|                   |              |              |        |      |                                  | thiamine phosphate synthase thiE                                     | Pseudogene        | <i>Candidatus</i> Hamiltonella defensa                      | 53.846      | 7.20E-06  | ref WP_158380130.1 |
|                   |              |              |        |      |                                  | ATP-dependent RecD-like DNA helicase                                 | Pseudogene        | <i>Candidatus</i> Doolittlea endobia                        | 66.901      | 7.06E-67  | emb CUX96934.1     |
| <i>A. piceae</i>  | NODE_10959   | pAp2         | 4616   | 21.5 | Y                                | lipoyl synthase lipA                                                 | Intact            | <i>Serratia symbiotica</i>                                  | 69.792      | 7.38E-153 | gb NIH12524.1      |
|                   |              |              |        |      |                                  | ribose-5-phosphate isomerase RpiA                                    | Intact            | <i>Serratia symbiotica</i>                                  | 72.558      | 7.77E-113 | gb NIG88331.1      |
|                   |              |              |        |      |                                  | RepB family plasmid replication initiator protein                    | Intact            | <i>Providencia rettgeri</i>                                 | 67.117      | 3.02E-108 | ref WP_196535193.1 |
|                   |              |              |        |      |                                  | tRNA-leu                                                             | Intact            | <i>Providencia heimbachae</i>                               | 93.98       | 2.00E-25  | CP028384.1         |
|                   |              |              |        |      |                                  | Grx4 family monothiol glutaredoxin                                   | Intact            | <i>Candidatus</i> Arsenophonus triatominarum                | 69.412      | 8.78E-40  | ref WP_063656336.1 |
| <i>A. piceae</i>  | NODE_8735    | pAp3         | 6680   | 21.4 | Y                                | Hsp20 family protein                                                 | Intact            | <i>Buttiauxella warmboldiae</i>                             | 60.897      | 4.38E-68  | ref WP_124022293.1 |
|                   |              |              |        |      |                                  | ABC transporter substrate-binding protein                            | Intact            | <i>Sodalis</i> -like symbiont of <i>Philaenus spumarius</i> | 48.945      | 3.80E-57  | gb OZI14334.1      |
|                   |              |              |        |      |                                  | replication associated protein RepA1                                 | Intact            | <i>Candidatus</i> Hamiltonella defensa                      | 75.618      | 5.32E-155 | ref WP_174889681.1 |
| <i>P. similis</i> | NODE_5623    | pPs1         | 7561   | 25.9 | N                                | replication initiation protein                                       | Intact            | <i>Arsenophonus nasoniae</i>                                | 60.064      | 6.05E-134 | ref WP_135679345.1 |
|                   |              |              |        |      |                                  | autotransporter outer membrane beta-barrel domain-containing protein | Intact            | <i>Candidatus</i> Regiella insecticola                      | 65.909      | 5.53E-147 | ref WP_006706193.1 |
| <i>P. similis</i> | NODE_8772    | pPs2         | 3236   | 28.3 | N                                | Autotransporter beta-domain superfamily protein                      | Intact            | <i>Candidatus</i> Erwinia haradaeae                         | 38.786      | 6.03E-155 | emb VFP88765.1     |
| <i>P. similis</i> | NODE_11021   | pPs3         | 1988   | 26.5 | N                                | TraY domain-containing protein                                       | Intact            | <i>Candidatus</i> Hamiltonella defensa                      | 67.273      | 1.73E-18  | ref WP_100103797.1 |

Supplementary Table 3. Basic genome (main chromosome) characteristics and GenBank accessions of adelgid symbionts. Accessions for *Vallotia* symbionts list the main chromosome plus plasmid.

| Bacterium                                | GenBank Accession | Genome size (bp) | Average intergenic length | Intergenic sequences > 300 bp | Total ORFs (CDS) | Hypothetical CDS | Overall GC | Total $\Psi$ | $\Psi$ (no predicted ORF)* | tRNA | rRNA  | Coverage |
|------------------------------------------|-------------------|------------------|---------------------------|-------------------------------|------------------|------------------|------------|--------------|----------------------------|------|-------|----------|
| ' <i>Ca. Annandia adelgestsuga</i> '     | CP026513          | 334,746          | 108.9                     | 16                            | 313              | 8                | 17.80%     | 20           | 7                          | 29   | 1,1,1 | 17       |
| ' <i>Ca. Annandia pinicola</i> '         | CP045876          | 348,580          | 84.1                      | 10                            | 327              | 11               | 18.70%     | 12           | 4                          | 28   | 1,1,1 | 1430     |
| ' <i>Ca. Ecksteinia adelgidicola</i> '   | CP045239          | 980,458          | 1116.7                    | 289                           | 459              | 4                | 19.70%     | 33           | 10                         | 33   | 1,1,1 | 50       |
| ' <i>Ca. Profftia lariciata</i> '        | CP045925          | 1,206,213        | 1046.3                    | 352                           | 599              | 12               | 22.30%     | 47           | 24                         | 35   | 1,1,1 | 29       |
| ' <i>Ca. Profftia kitamiensis</i> '      | CP080506          | 1,185,617        | 1238.6                    | 338                           | 578              | 6                | 24.7%      | 38           | 20                         | 34   | 1,1,1 | 58       |
| ' <i>Ca. Gillettella cooleyia</i> '      | CP047043          | 1,413,195        | 1147.7                    | 401                           | 711              | 91               | 34.00%     | 101          | 60                         | 37   | 1,1,1 | 115      |
| ' <i>Ca. Steffania adelgidicola</i> '    | CP045889          | 1,369,541        | 867.3                     | 433                           | 795              | 87               | 37.10%     | 104          | 62                         | 40   | 2,1,1 | 130      |
| ' <i>Ca. Hartigia pinicola</i> '         | CP048208          | 2,034,350        | 1882.3                    | 434                           | 747              | 51               | 25.70%     | 65           | 37                         | 35   | 1,1,1 | 118      |
| ' <i>Ca. Vallotia lariciata</i> '        | CP047398-CP047399 | 1,064,389        | 508.5                     | 316                           | 758              | 87               | 42.70%     | 116          | 70                         | 43   | 3,3,3 | 264      |
| ' <i>Ca. Vallotia cooleyia</i> '         | CP047396-CP047397 | 1,174,085        | 466.2                     | 345                           | 877              | 112              | 45.90%     | 102          | 61                         | 43   | 3,3,3 | 1049     |
| ' <i>Ca. Vallotia kitamiensis</i> '      | CP080504-CP080505 | 1,105,254        | 534.7                     | 306                           | 800              | 66               | 43.4%      | 62           | 36                         | 43   | 3,3,3 | 187      |
| ' <i>Ca. Pseudomonas adelgestsugas</i> ' | CP026512          | 1,835,598        | 1063.2                    | 519                           | 985              | 177              | 39.50%     | 200          | 163                        | 38   | 1,1,1 | 35       |

\*This sub-category of pseudogenes contains those that have no predicted ORFs, but nevertheless have homology to protein-coding sequences in the NR database when the region between flanking genes is translated into 6 frames (<https://github.com/filip-husnik/pseudofinder/>)

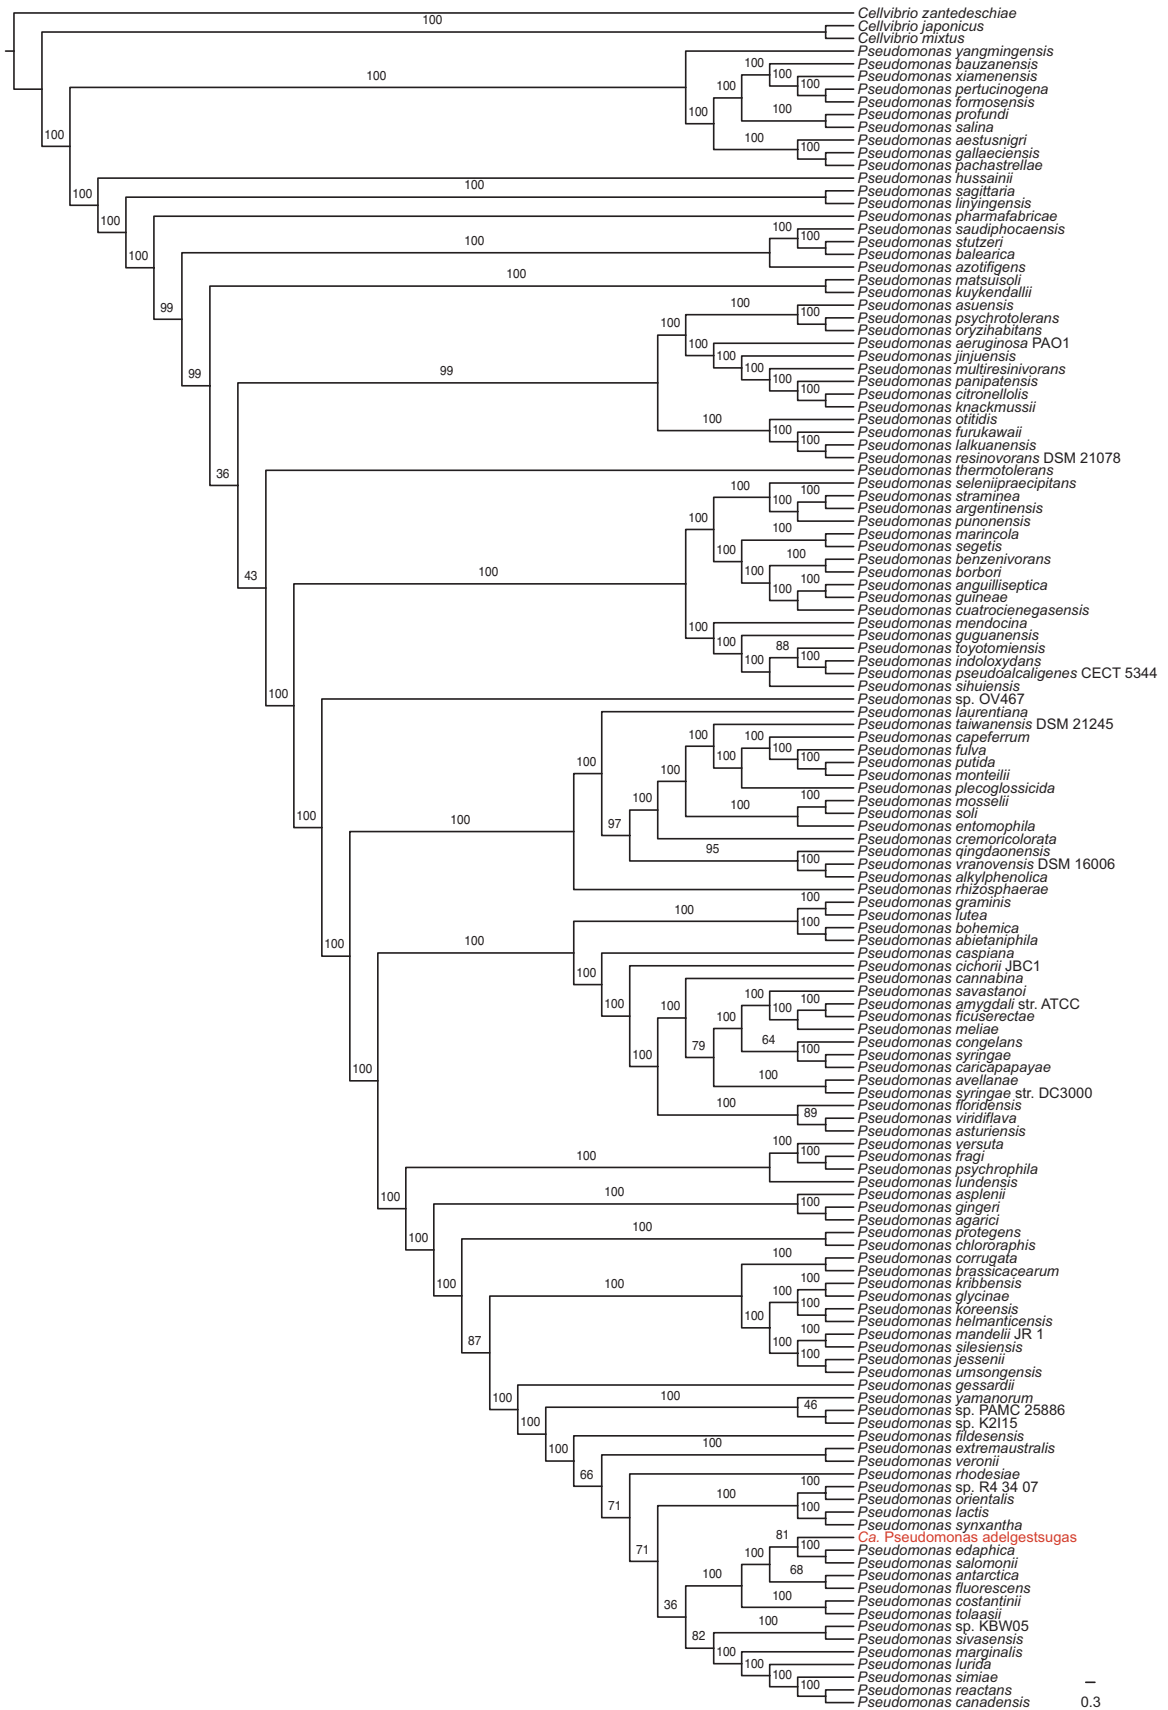

Supplementary Figure 1. Phylogenetic relationship of *Pseudomonas adelgestsugas* from *A. tsugae* within the *Pseudomonadales*. Maximum likelihood phylogeny using 351 single-copy orthologs. *P. adelgestsugas* is shown in red. Support values are based on 1000 bootstrap replicates.

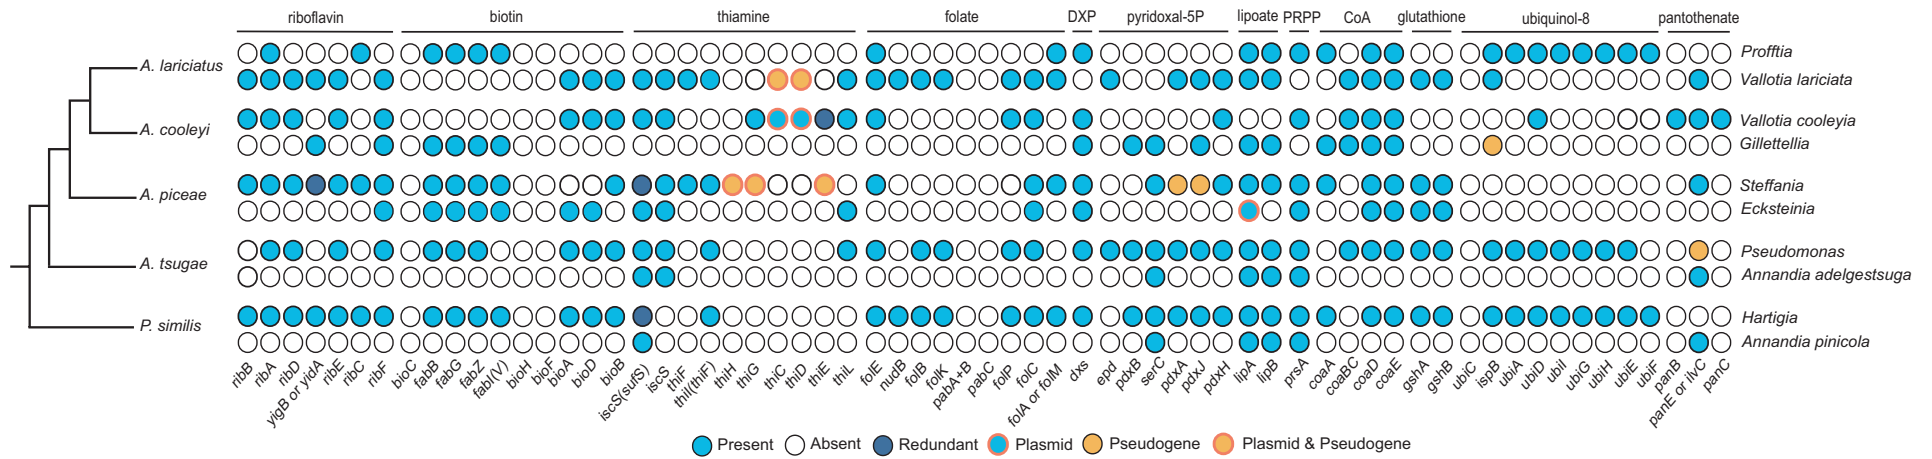

Supplementary Figure 2. Nutritional complementation in production of vitamins for co-symbionts from each adelgid lineage. Genes encoding enzymes involved in biosynthetic pathways are shown as column names. Standard abbreviations for genes are used. Genes are indicated as redundant when there exists more than one gene or gene copy that can complete the pathway. Several genes involved in vitamin biosynthesis are located on symbiont genome plasmids.

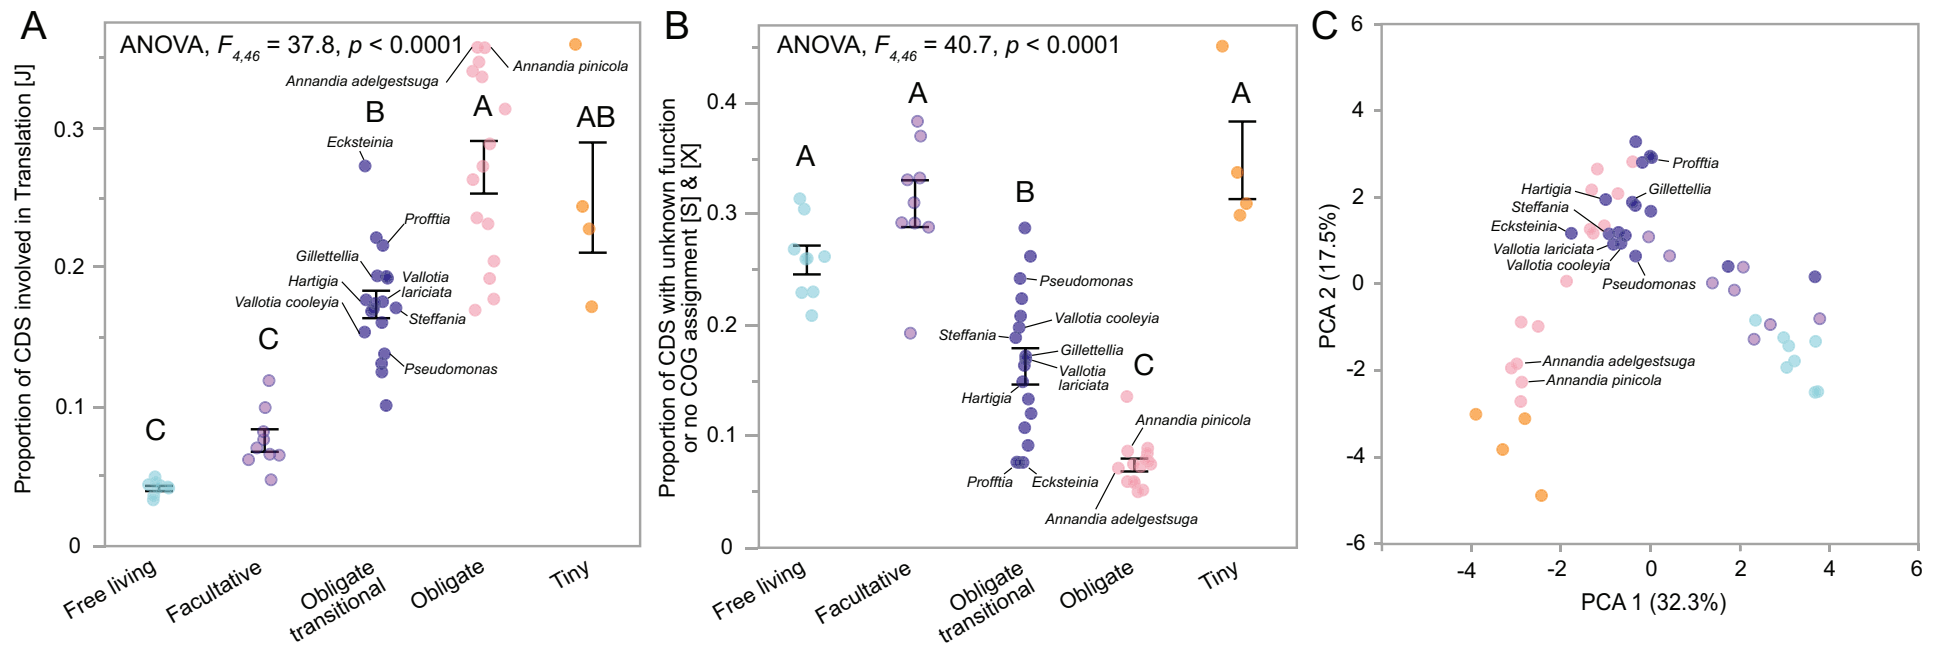

Supplementary Figure 3. Analysis of proportions of CDS belonging to specific COG categories for bacteria that are free-living or insect symbionts in different stages of genome degradation. A. Proportion of CDS involved in COG category J: translation. B. Proportion of CDS involved in COG categories S and X: unknown function or no COG assignment. Error bars indicate standard error of means, and letters above error bars represent differences among means. Principal Components Analysis (C) of variation in proportions of CDS belonging to all COG categories. Bacterial types are colored as for panels (A) and (B). Adelgid symbionts are indicated with text labels.

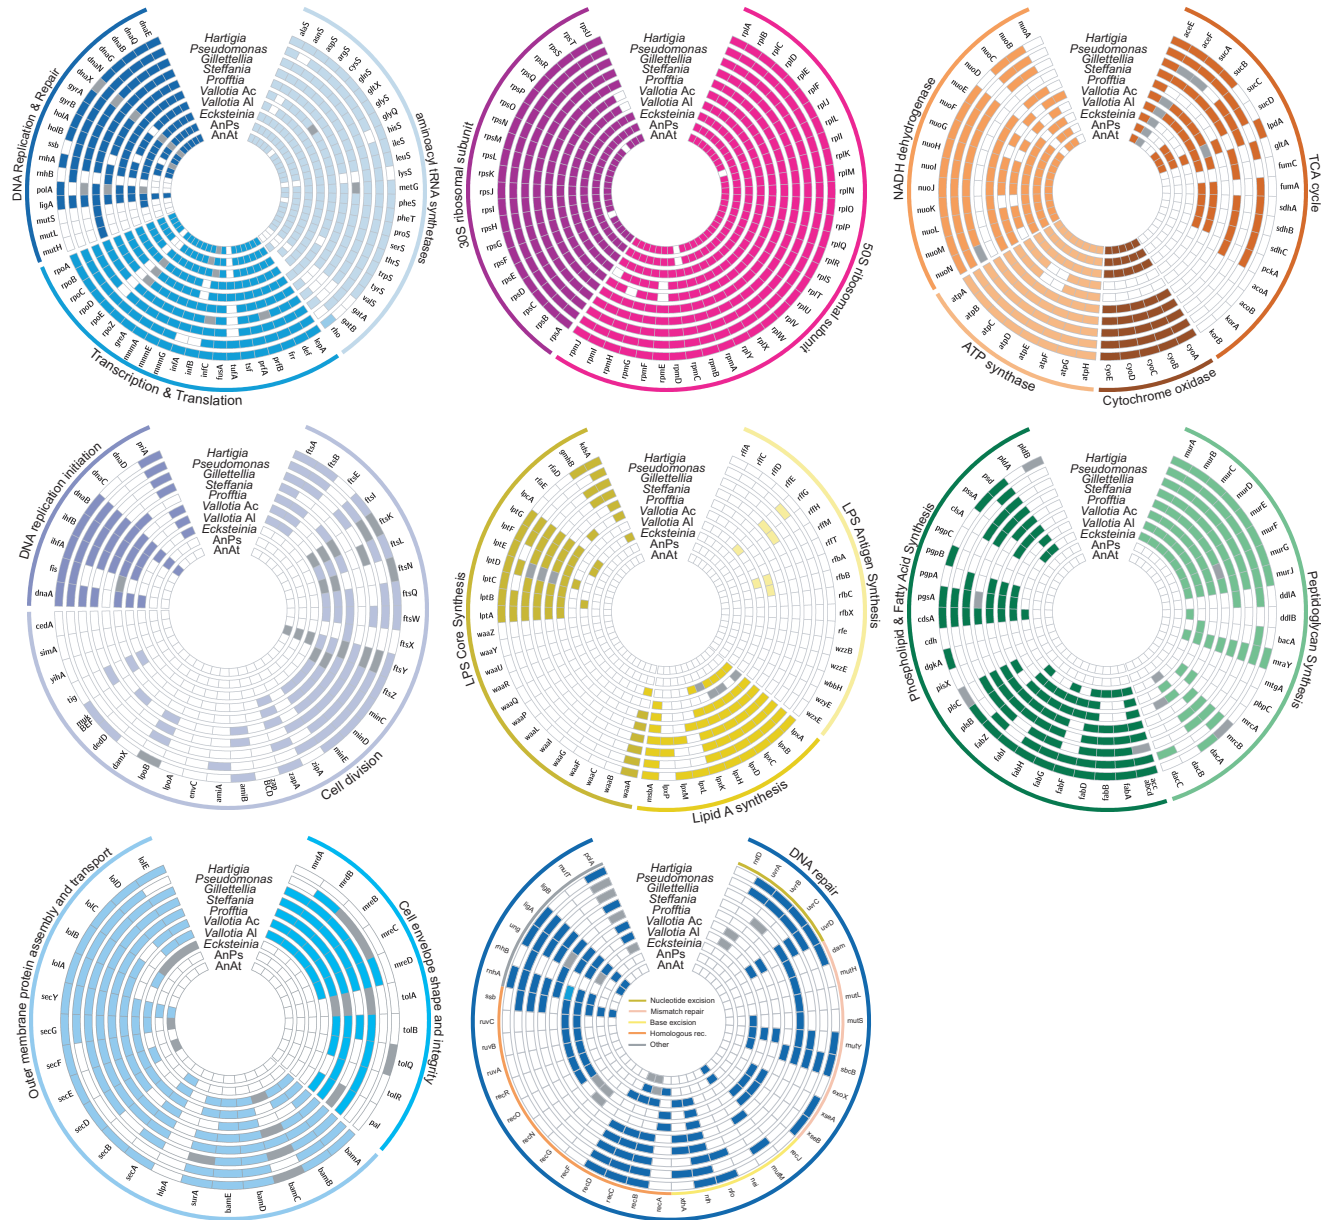

Supplementary Figure 4. Conservation of core genes involved in central cellular processes for adelgid symbiont chromosomes. Colored boxes represent gene presence, unfilled boxes represent gene absence, and gray boxes indicate pseudogenes.

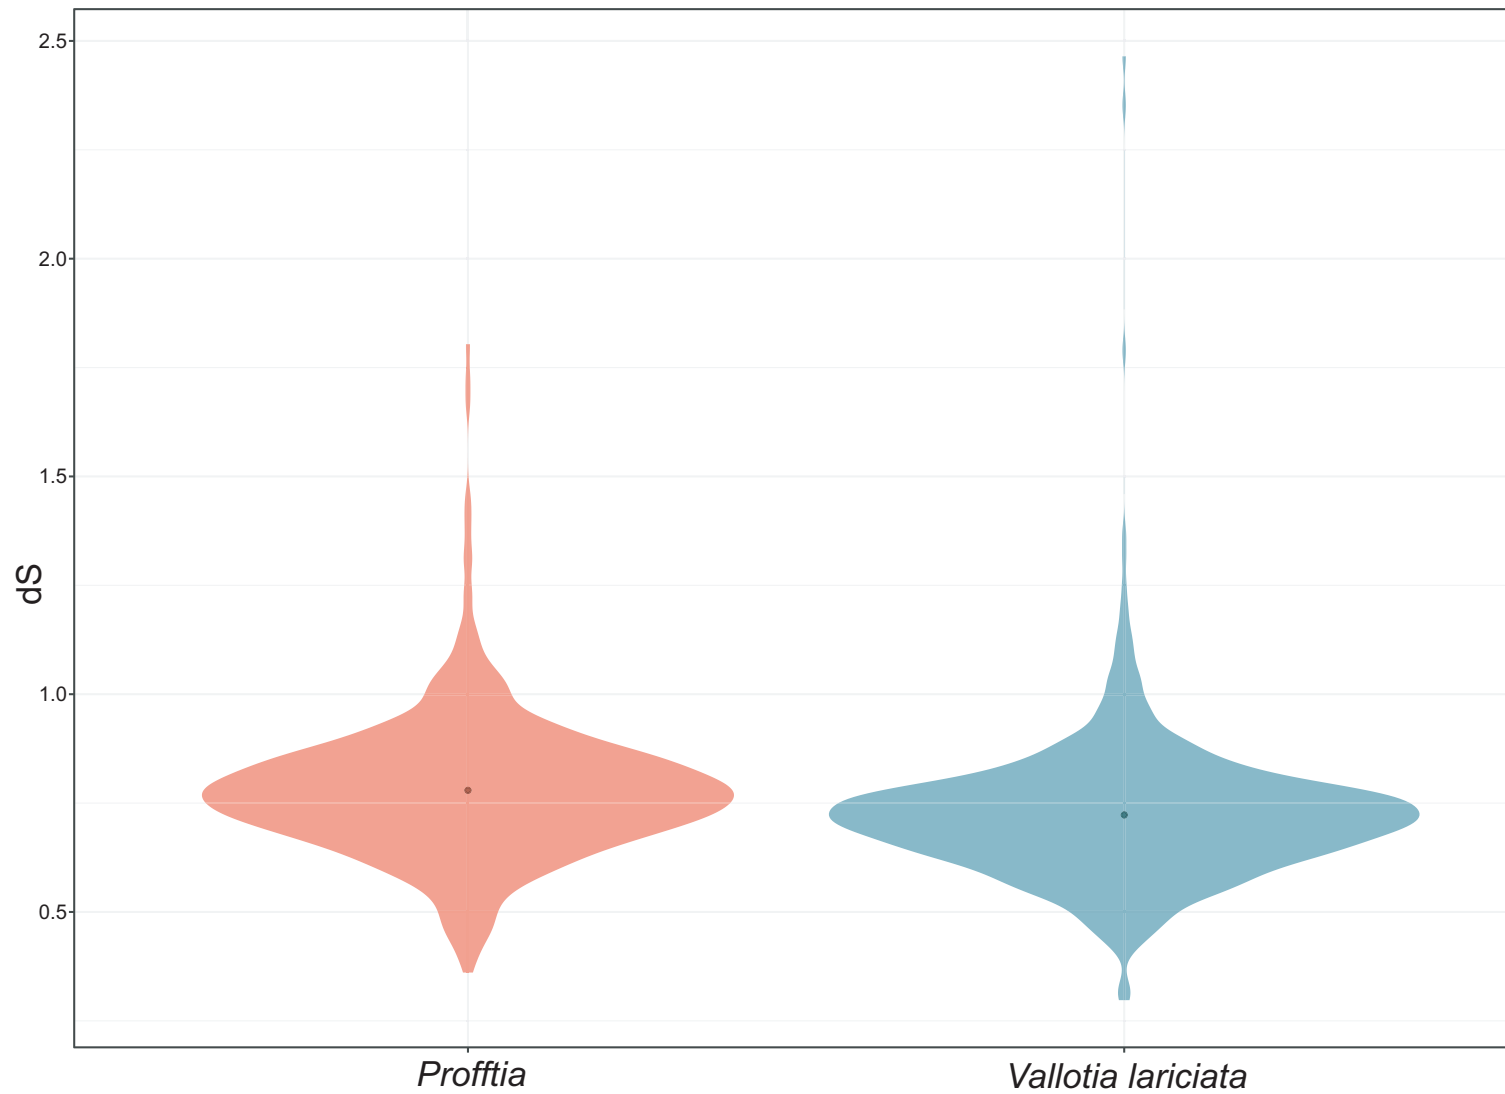

Supplementary Figure 5. Violin plots of the distributions of dS values for pairwise comparisons of orthologous genes in *A. lariciatus* and *A. kitamiensis* symbionts. Mean values are indicated by points and are 0.78 and 0.72 for *Profftia* and *Vallotia*, respectively.
